# Supplementary material for: Relative Fat Mass as an estimator of whole-body fat percentage among children and adolescents: A cross-sectional study using NHANES
Source: PubMed Central journal article supplement (PMC6813362; doi:10.1038/s41598-019-51701-z), 2019-10-24
Supplement: 41598_2019_51701_MOESM1_ESM.pdf [file 41598_2019_51701_MOESM1_ESM.pdf]

## Supplementary Material

### **Relative Fat Mass as an estimator of whole-body fat percentage among children and adolescents: A cross-sectional study using NHANES**

Orison O. Woolcott, MD\*, Richard N. Bergman, PhD

Sports Spectacular Diabetes and Obesity Wellness and Research Center, Cedars-Sinai Medical Center,  
Los Angeles, CA 90048, USA

Running title: Estimation of body fat percentage

\*Corresponding author:

Orison O. Woolcott, MD  
Sports Spectacular Diabetes and Obesity Wellness and Research Center  
Cedars-Sinai Medical Center  
127 South San Vicente Blvd, AHSP A9220  
Los Angeles, CA 90048  
United States of America  
Telephone: +1 (310) 423-2926  
Email: [Orison.Woolcott@cshs.org](mailto:Orison.Woolcott@cshs.org)

## Table of Contents

|                                                                                                                                                                                                                |    |
|----------------------------------------------------------------------------------------------------------------------------------------------------------------------------------------------------------------|----|
| Supplementary Figure 1. Variability of anthropometrics and body composition by age among children and adolescents. ....                                                                                        | 3  |
| Supplementary Figure 2. RFMp and RFM values as functions of age. ....                                                                                                                                          | 4  |
| Supplementary Figure 3. Prediction of whole-body fat percentage among girls by ethnicity. ....                                                                                                                 | 5  |
| Supplementary Figure 4. Prediction of whole-body fat percentage among boys by ethnicity. ....                                                                                                                  | 6  |
| Supplementary Figure 5. Agreement Bland-Altman plots between whole-body fat percentage estimated by RFMp (RFM pediatric) and that measured by DXA among children and adolescents 8 to 14 years of age. ....    | 7  |
| Supplementary Figure 6. Agreement Bland-Altman plots between whole-body fat percentage estimated by RFM and that measured by DXA among adolescents 15 to 19 years of age. ....                                 | 8  |
| Supplementary Figure 7. Performance of RFMp by quintiles of DXA-measured body fat percentage. ....                                                                                                             | 9  |
| Supplementary Figure 8. Comparison of accuracy of RFMp and RFM linear equations with BMI and TMI quadratic equations. ....                                                                                     | 10 |
| Supplementary Figure 9. Performance of RFM by quintiles of DXA-measured body fat percentage. ....                                                                                                              | 11 |
| Supplementary Figure 10. Comparison of total misclassification error rates in the diagnosis of overweight or obesity between indices among children and adolescents 8 to 14 years of age. ....                 | 12 |
| Supplementary Figure 11. Comparison of total misclassification error rates in the diagnosis of overweight or obesity between indices among adolescents 15 to 19 years of age. ....                             | 13 |
| Supplementary Table 1. Derived equations for the prediction of DXA-estimated whole-body fat percentage among participants (8 to 19 years of age) in NHANES 1999-2006. ....                                     | 14 |
| Supplementary Table 2. Comparison of anthropometric indices for prediction of body fat percentage by sex and age among children and adolescents 8 to 14 years of age. ....                                     | 16 |
| Supplementary Table 3. Comparison of anthropometric indices for prediction of body fat percentage by sex and age among adolescents 15 to 19 years of age. ....                                                 | 17 |
| Supplementary Table 4. Performance of RFMp by ethnicity to estimate body fat percentage in children and adolescents 8 to 14 years of age. ....                                                                 | 18 |
| Supplementary Table 5. Performance of RFM by ethnicity to estimate body fat percentage in adolescents 15 to 19 years of age. ....                                                                              | 19 |
| Supplementary Table 6. Youden's index cutoffs, false negative rate, false positive rate, and Youden's index for anthropometric indices to diagnose overweight and obesity among children and adolescents. .... | 20 |
| Supplementary Table 7. Correlation matrix (Pearson's r) between anthropometrics and biomarkers for cardiometabolic disease among children and adolescents 8 to 14 years of age. ....                           | 21 |
| Supplementary Table 8. Correlation matrix (Pearson's r) between anthropometrics and biomarkers for cardiometabolic disease among adolescents 15 to 19 years of age. ....                                       | 22 |
| REFERENCE .....                                                                                                                                                                                                | 23 |

**Supplementary Figure 1.** Variability of anthropometrics and body composition by age among children and adolescents.

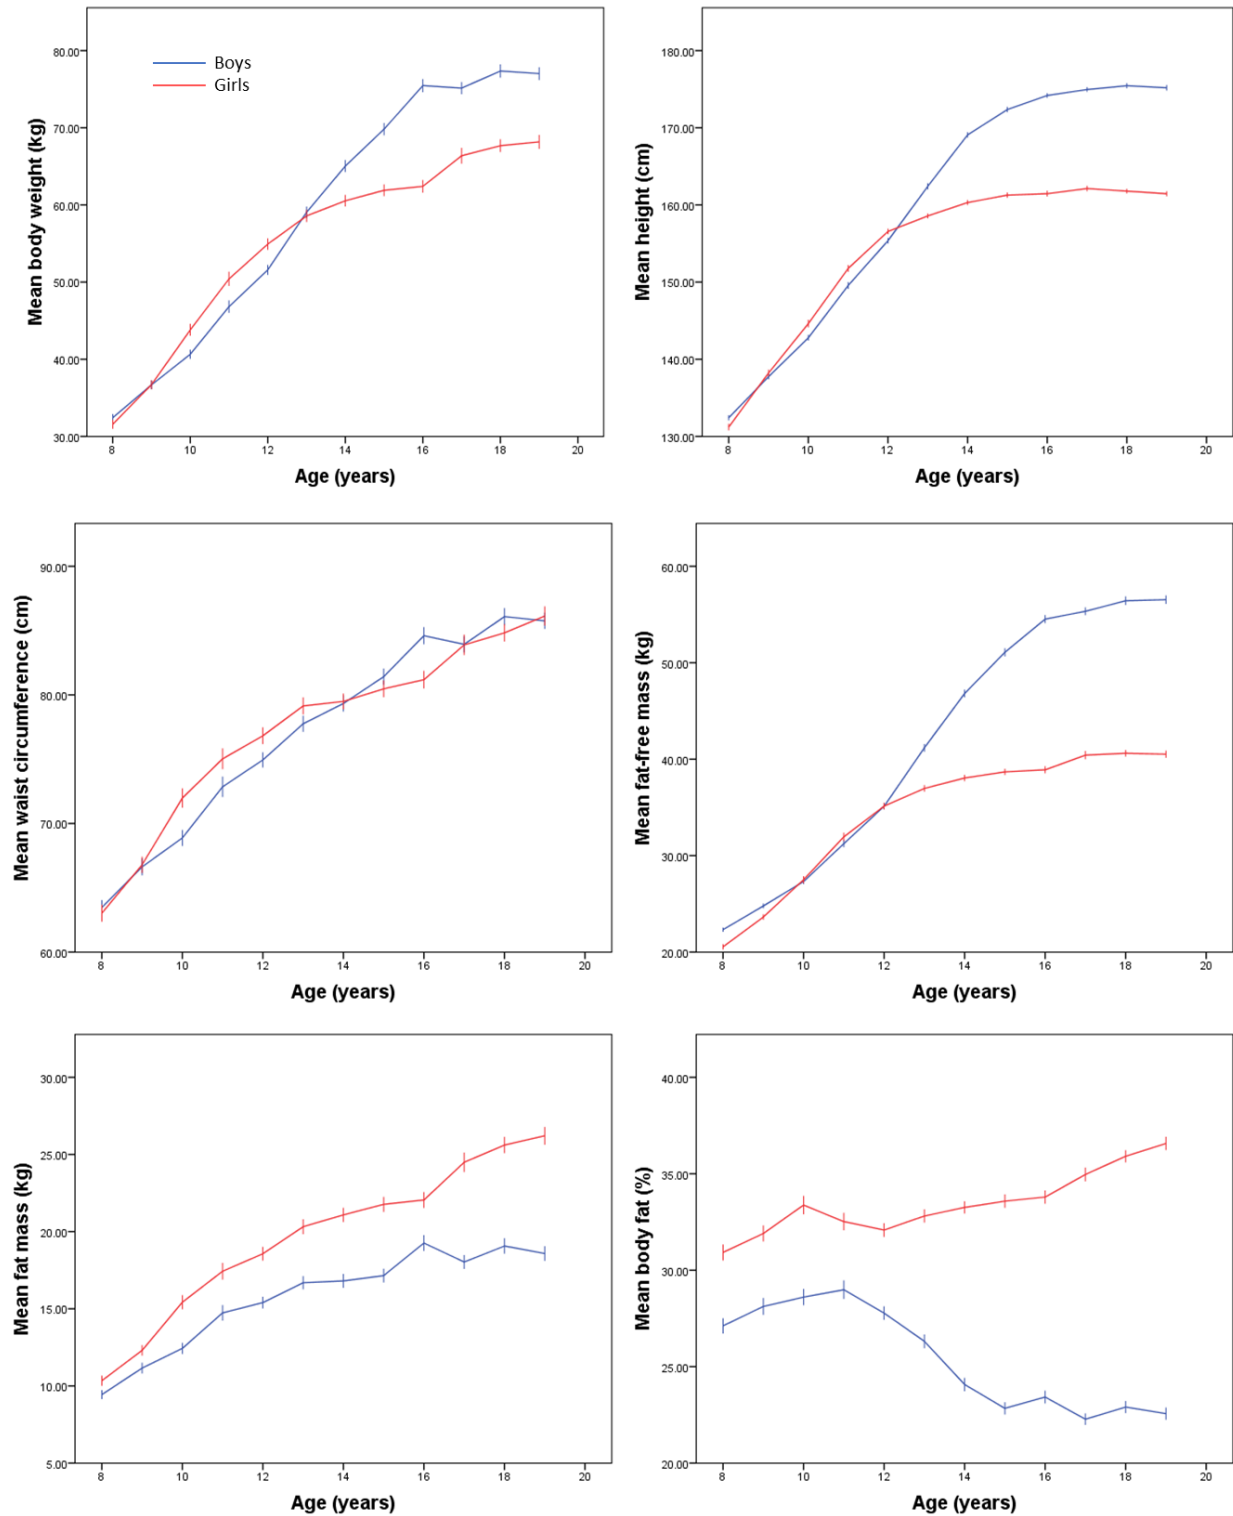

**Supplementary Figure 2.** RFMp and RFM values as functions of age.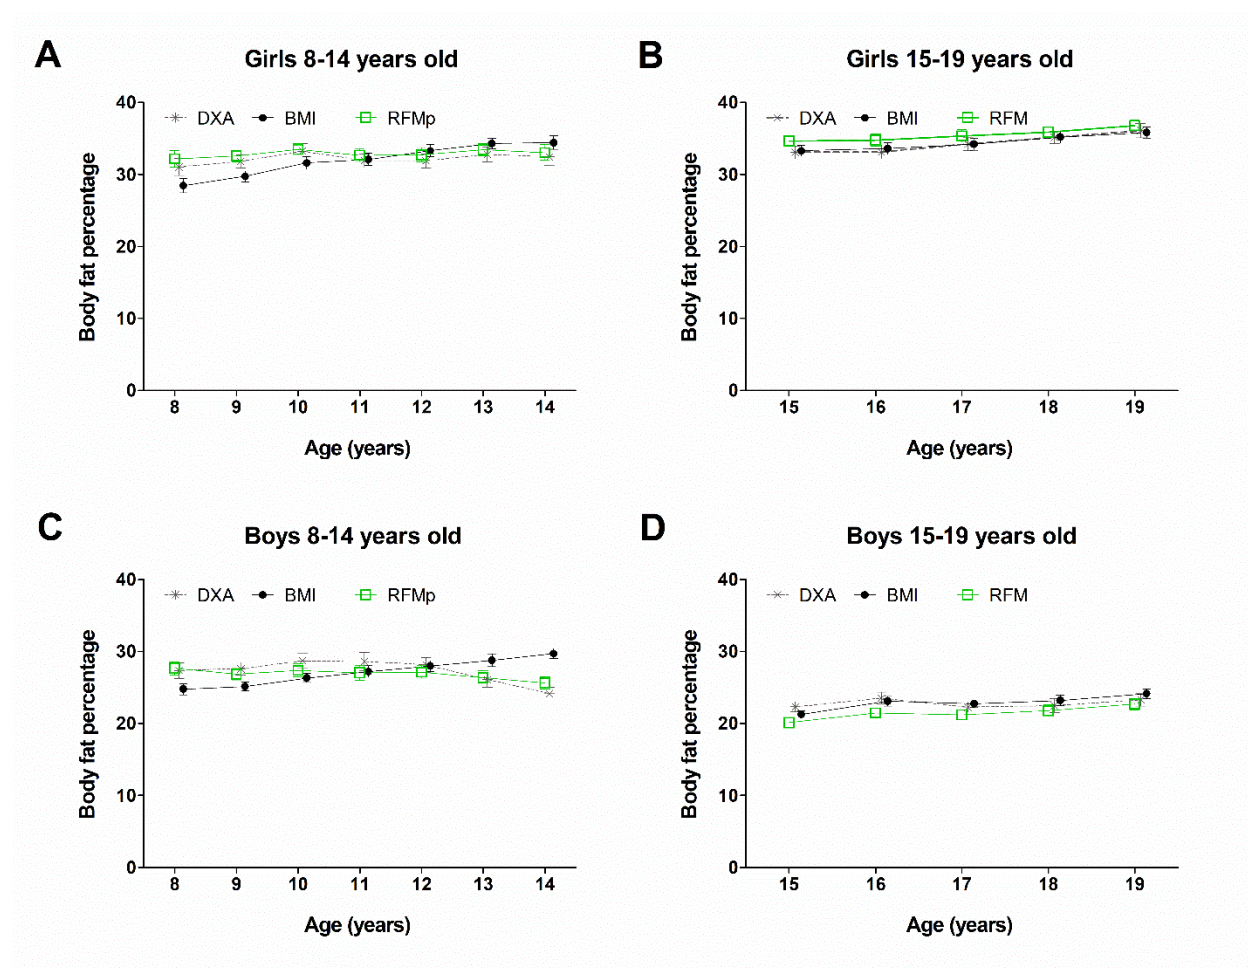

RFM, Relative Fat Mass; RFMp, Relative Fat Mass pediatric. Error bars are 95% confidence intervals.

Supplementary Figure 3. Prediction of whole-body fat percentage among girls by ethnicity.

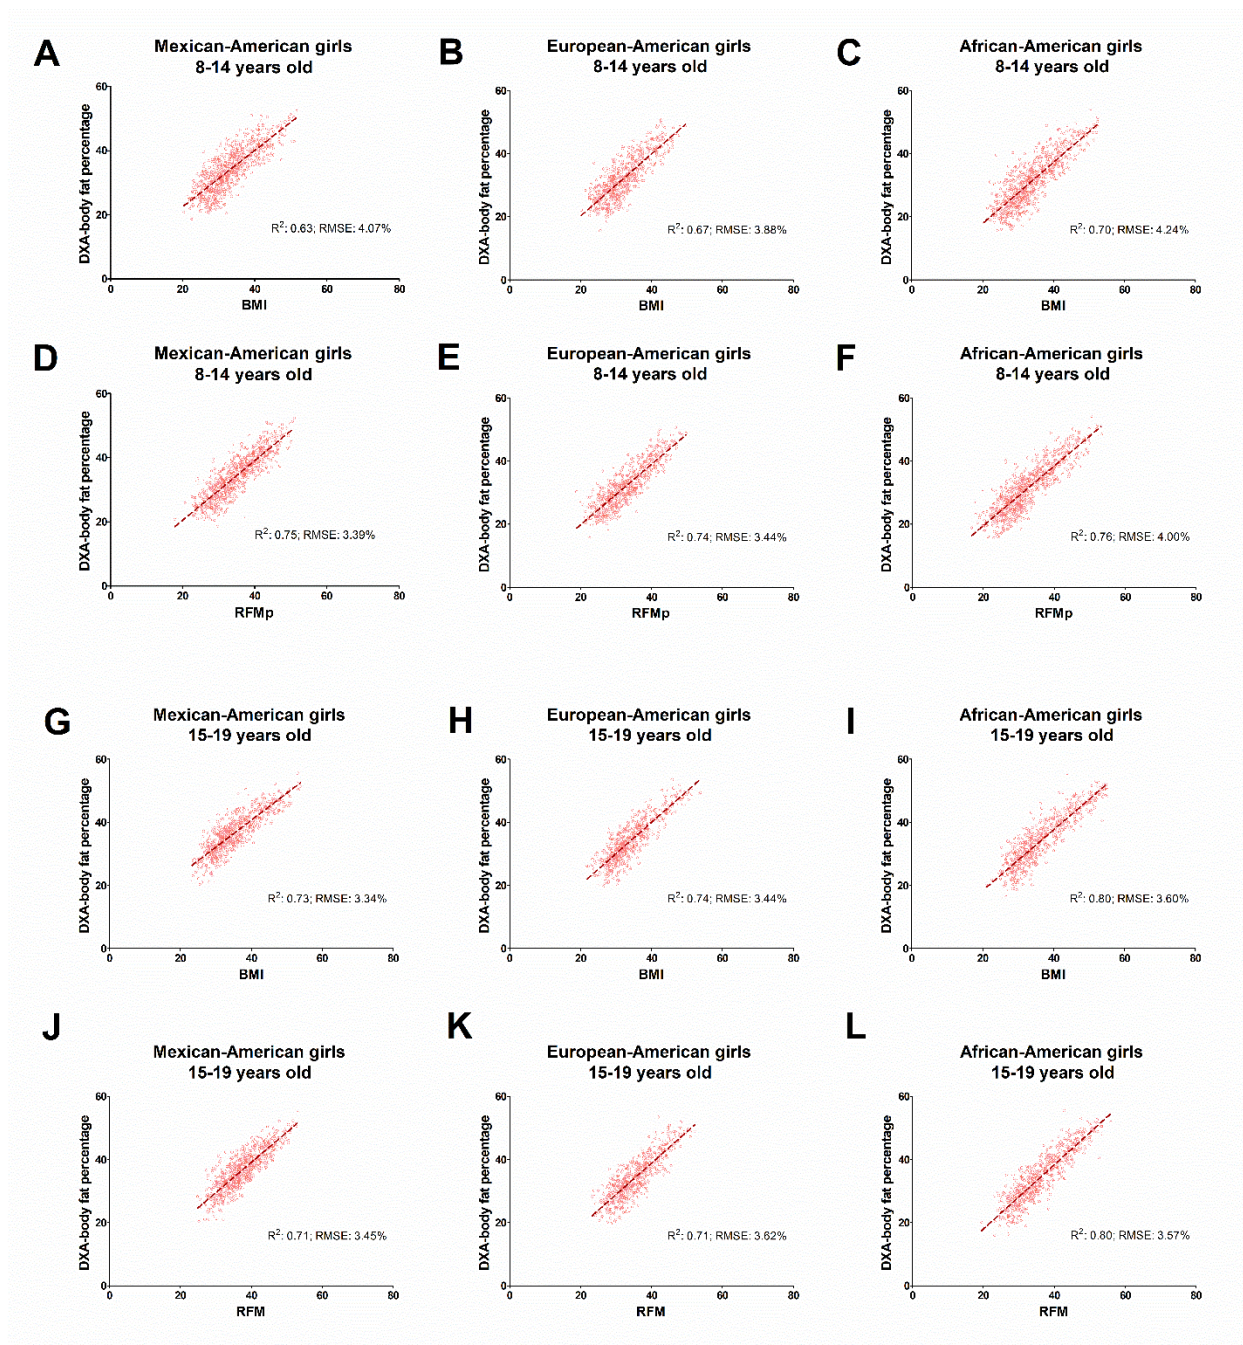

Supplementary Figure 4. Prediction of whole-body fat percentage among boys by ethnicity.

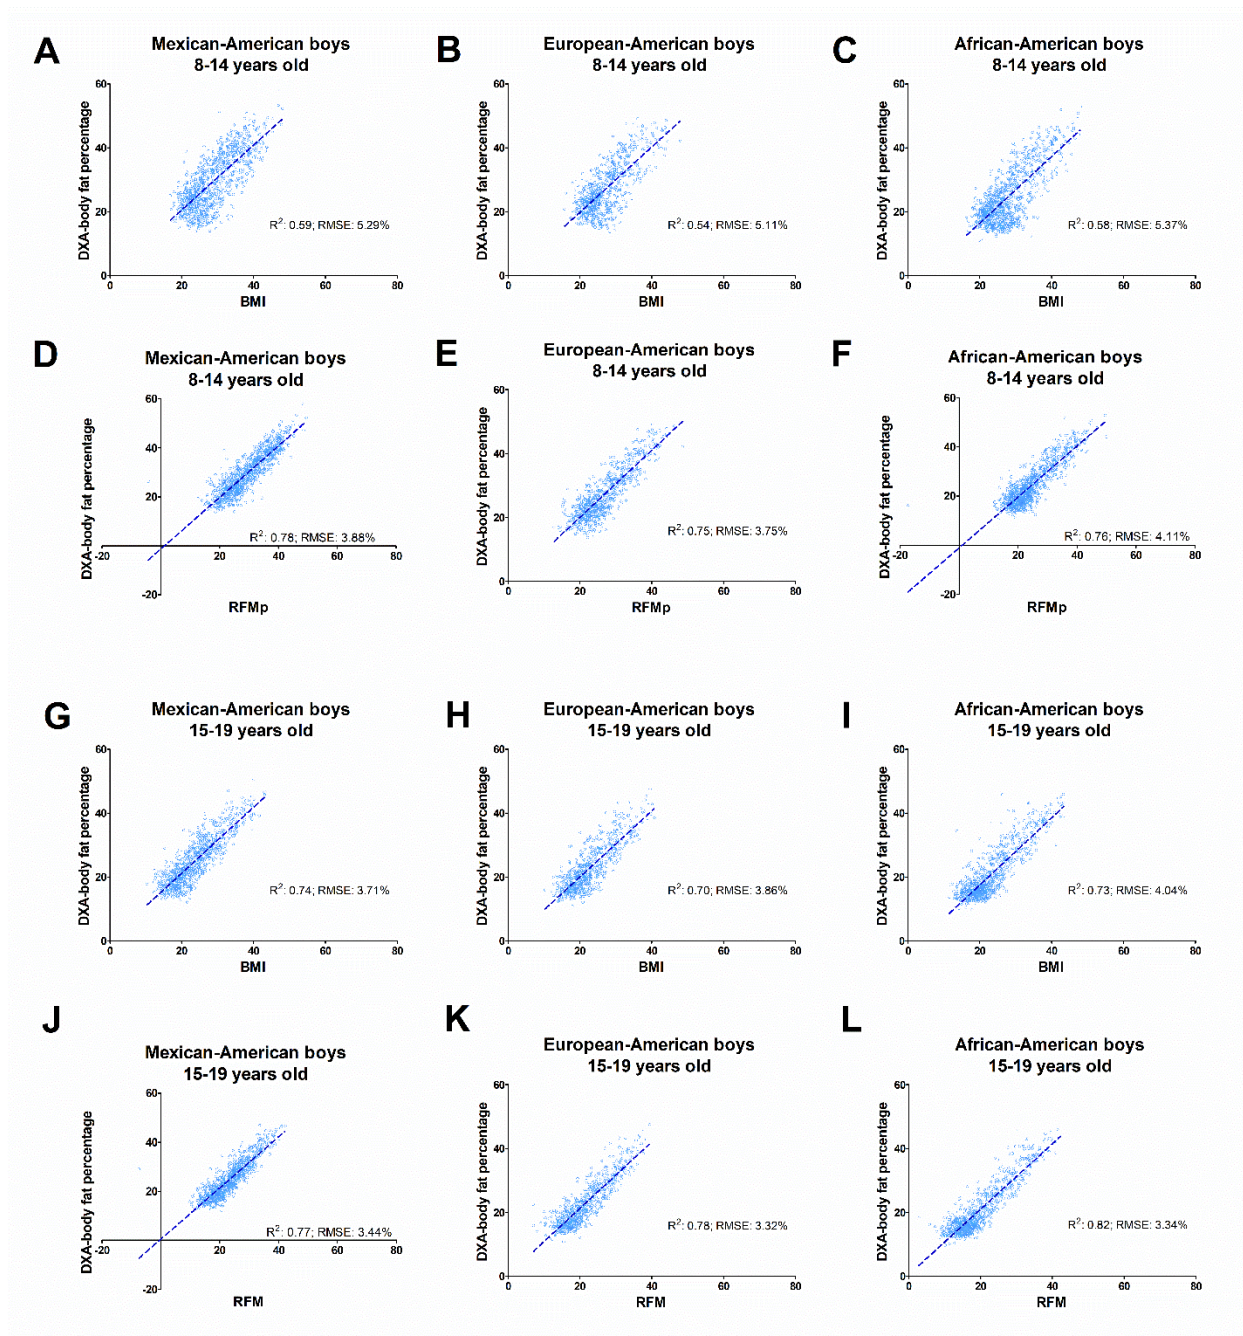

**Supplementary Figure 5.** Agreement Bland-Altman plots between whole-body fat percentage estimated by RFMp (RFM pediatric) and that measured by DXA among children and adolescents 8 to 14 years of age.

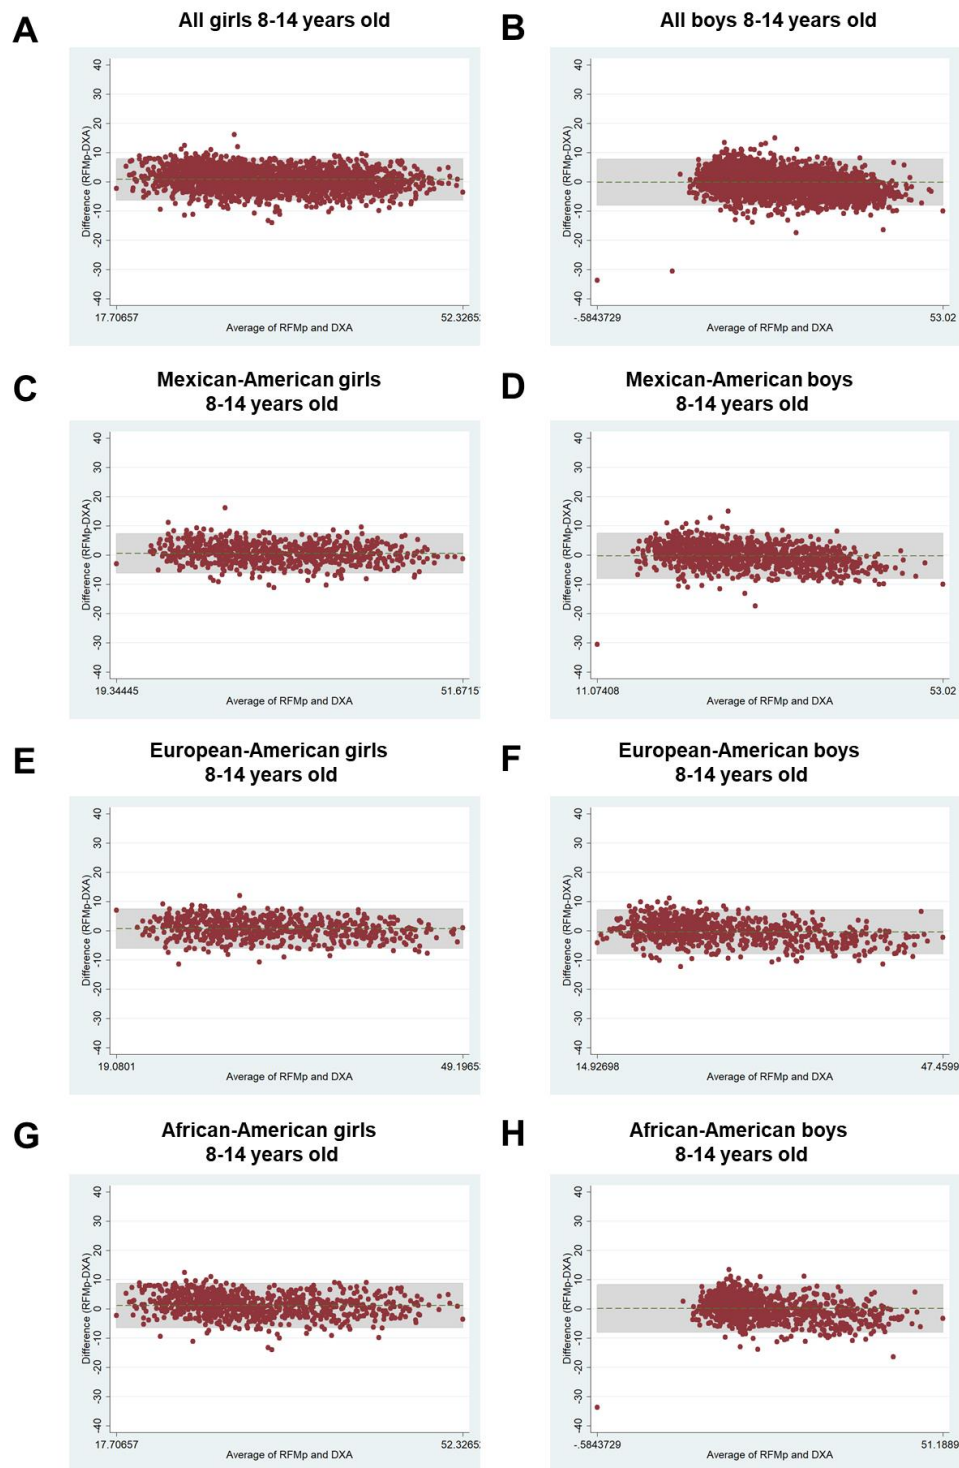

Gray bands indicate 95% limits of agreement. Green dotted lines represent the mean. Data plots correspond to DXA imputation 1.

**Supplementary Figure 6.** Agreement Bland-Altman plots between whole-body fat percentage estimated by RFM and that measured by DXA among adolescents 15 to 19 years of age.

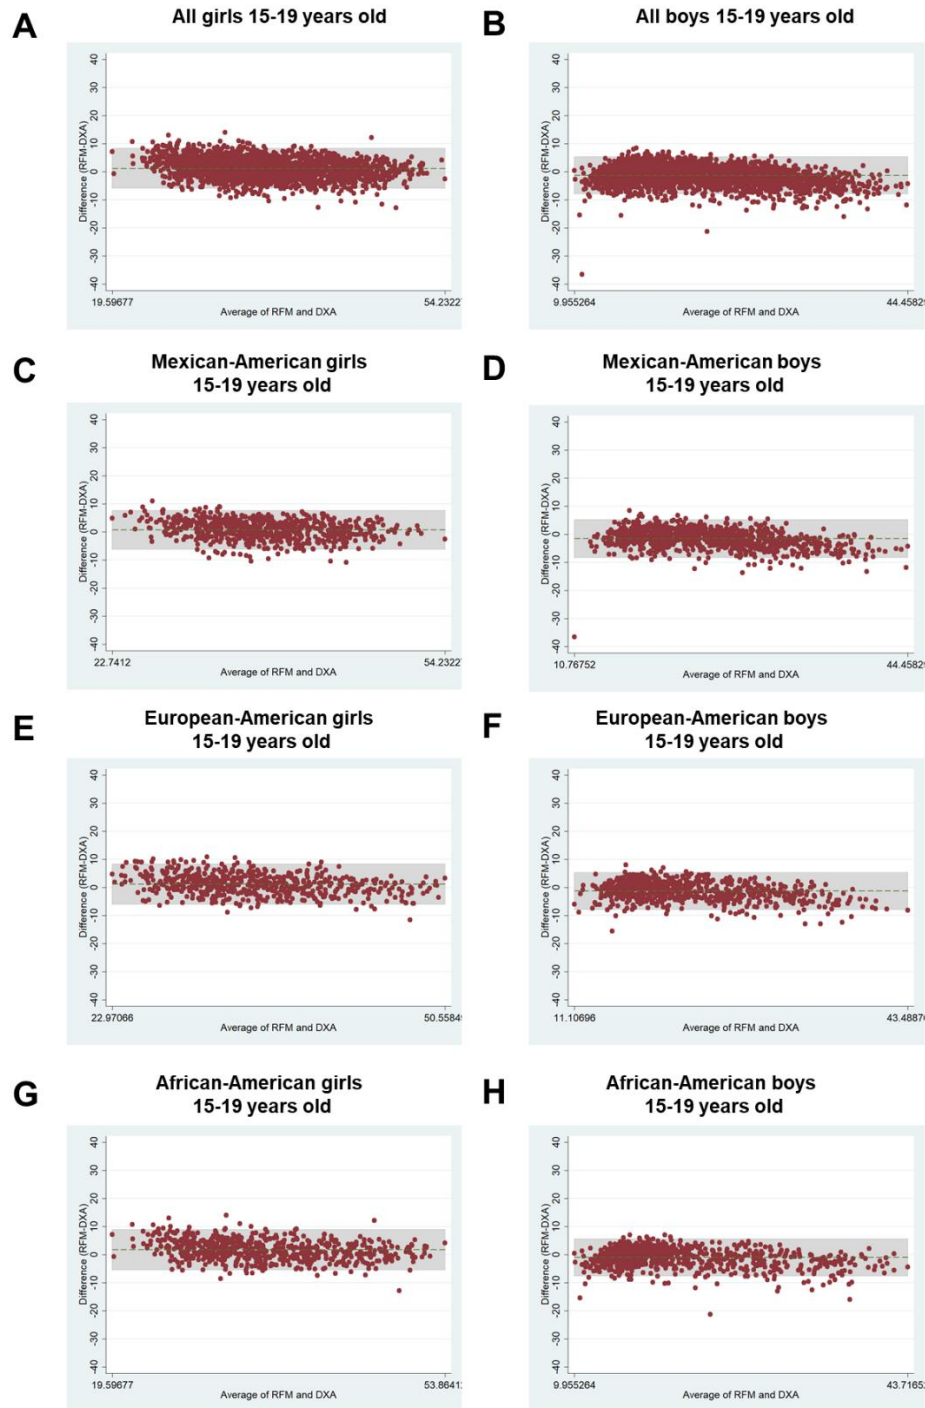

Gray bands indicate 95% limits of agreement. Green dotted lines represent the mean. Data plots correspond to DXA imputation 1.



**Supplementary Figure 7.** Performance of RFMp by quintiles of DXA-measured body fat percentage.

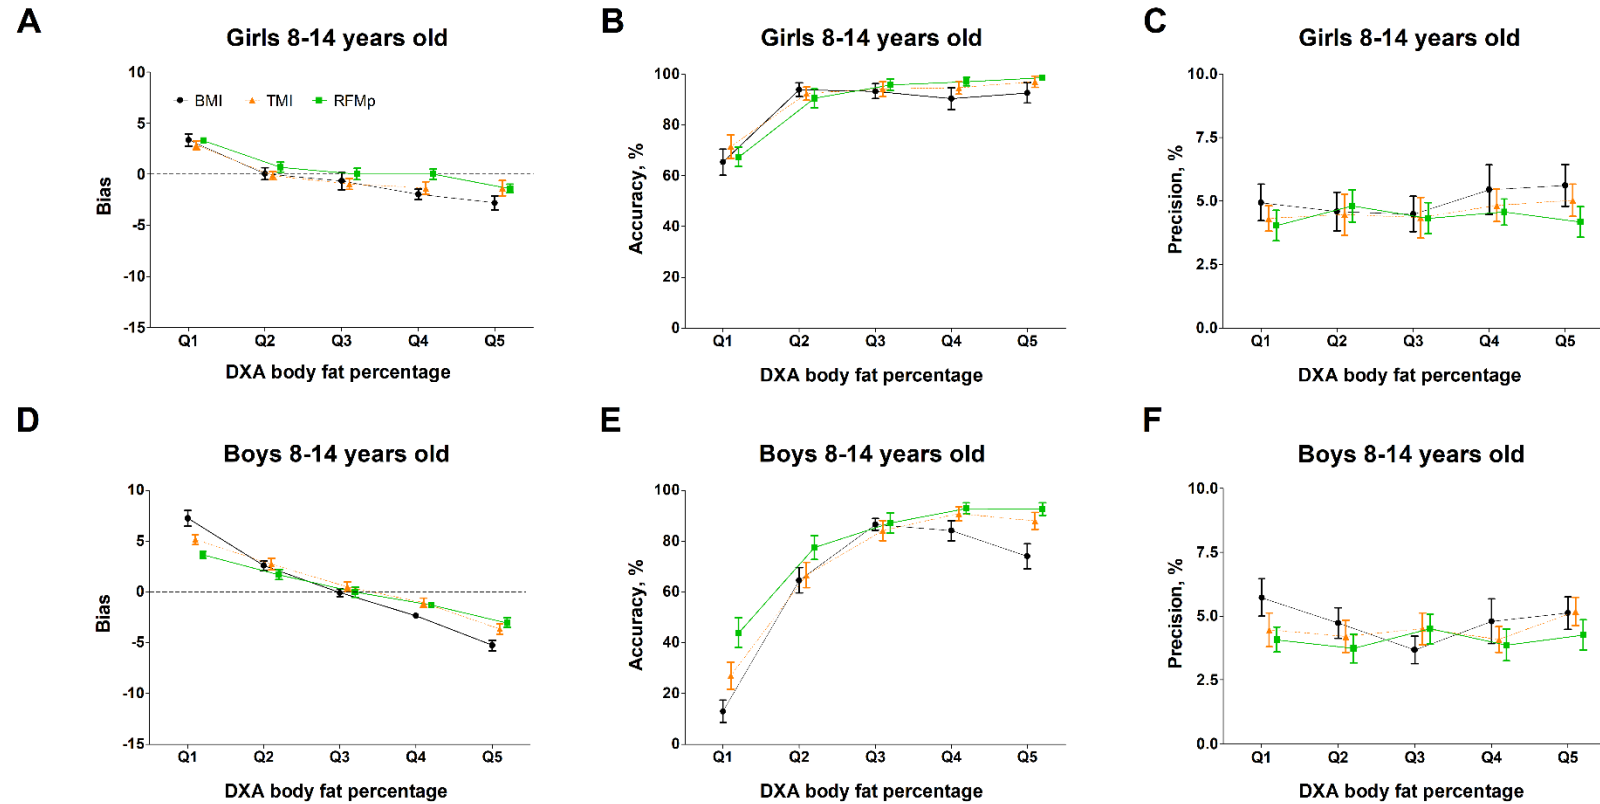

Bias was calculated as the median difference between estimated and measured body fat percentage. Accuracy was calculated as the percentage of cases with <20% difference between estimated and measured body fat percentage. Precision was calculated as the interquartile range of the difference between estimated and measured body fat percentage. Error bars are 95% confidence intervals.

**Supplementary Figure 8.** Comparison of accuracy of RFMp and RFM linear equations with BMI and TMI quadratic equations.

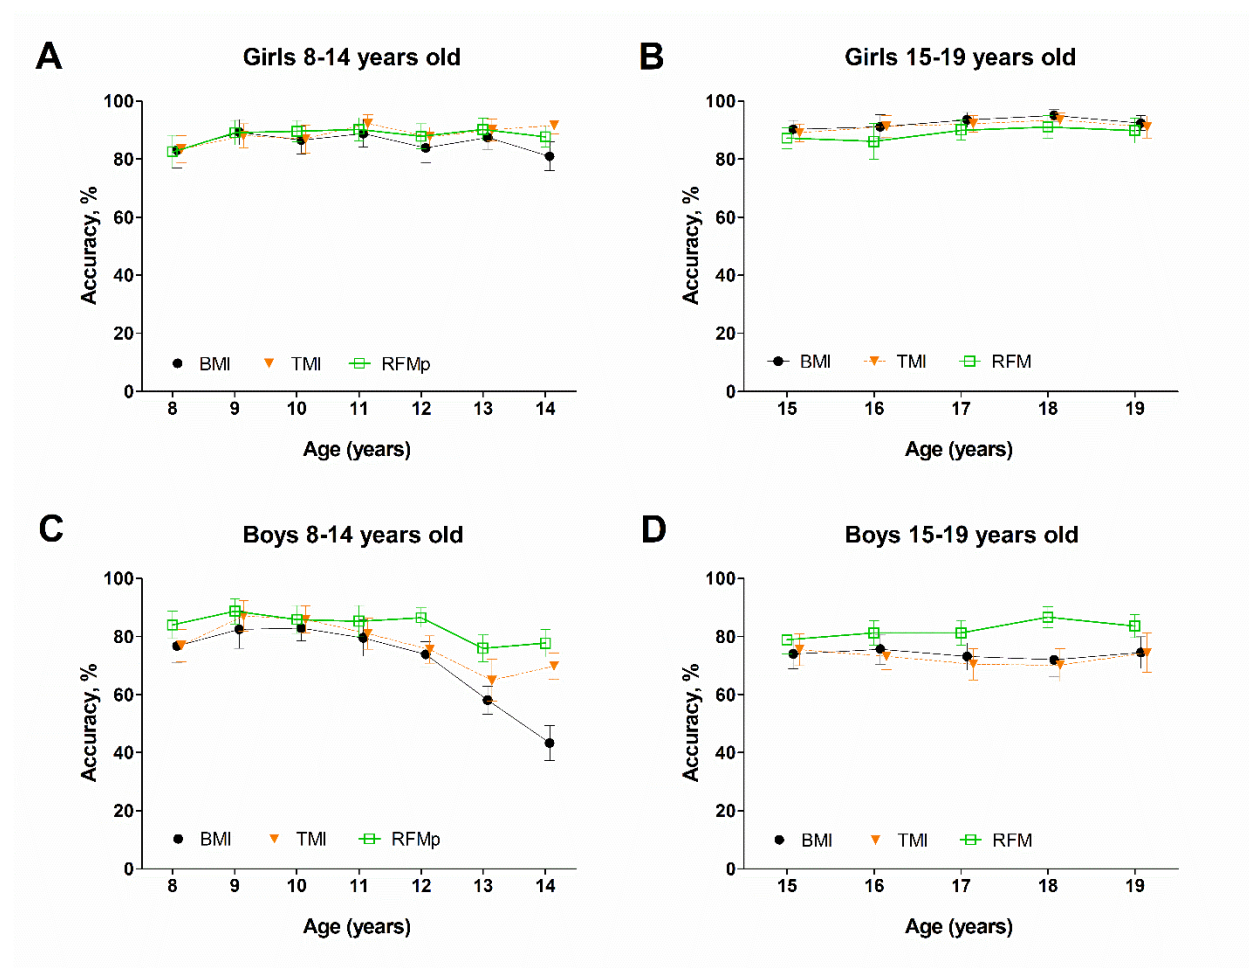

Error bars are 95% confidence intervals.

**Supplementary Figure 9.** Performance of RFM by quintiles of DXA-measured body fat percentage.

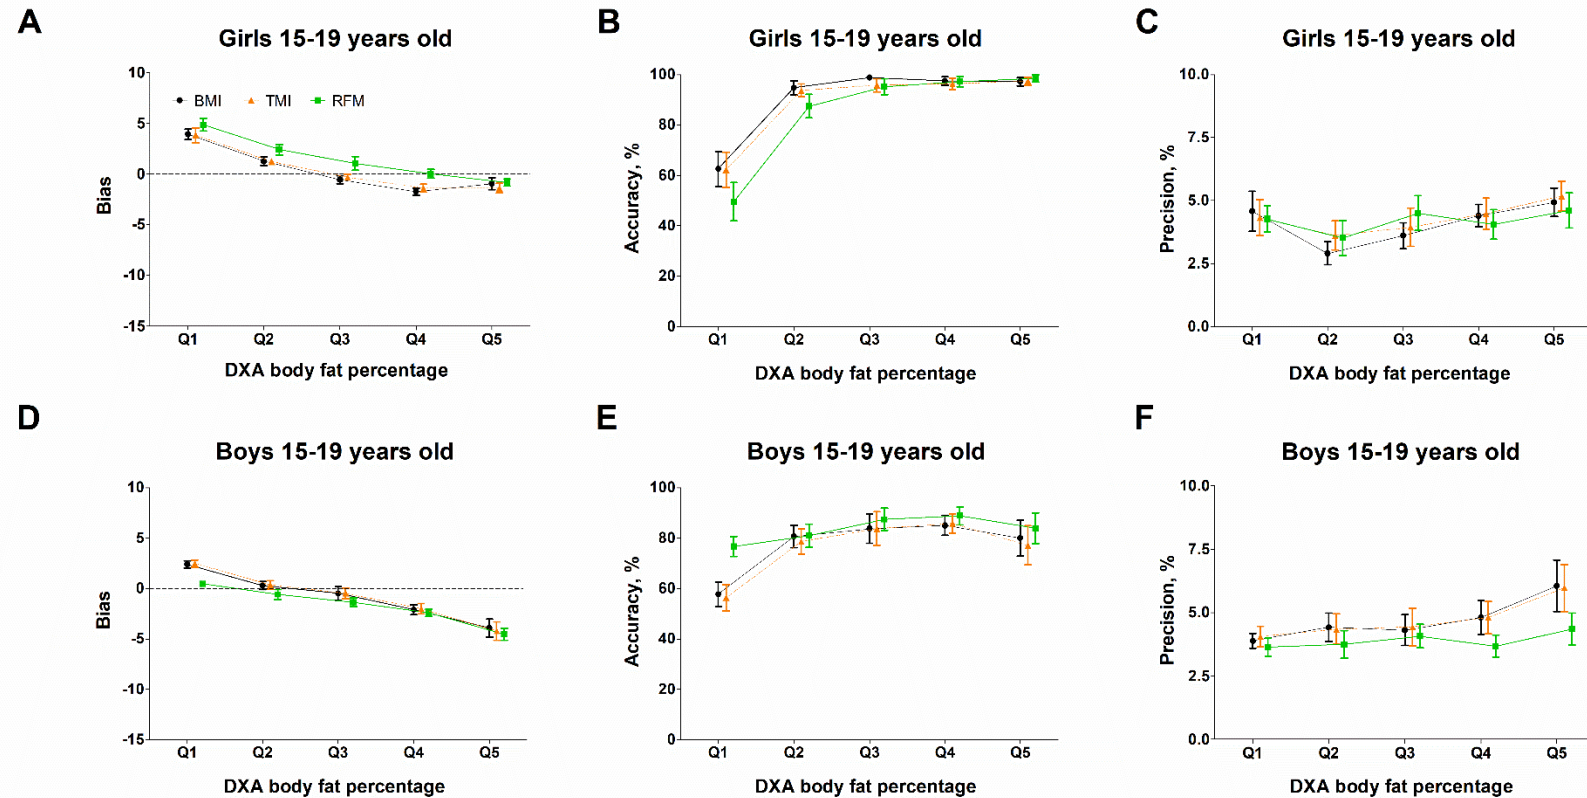

Bias was calculated as the median difference between estimated and measured body fat percentage. Accuracy was calculated as the percentage of cases with <20% difference between estimated and measured body fat percentage. Precision was calculated as the interquartile range of the difference between estimated and measured body fat percentage. Error bars are 95% confidence intervals.

**Supplementary Figure 10.** Comparison of total misclassification error rates in the diagnosis of overweight or obesity between indices among children and adolescents 8 to 14 years of age.

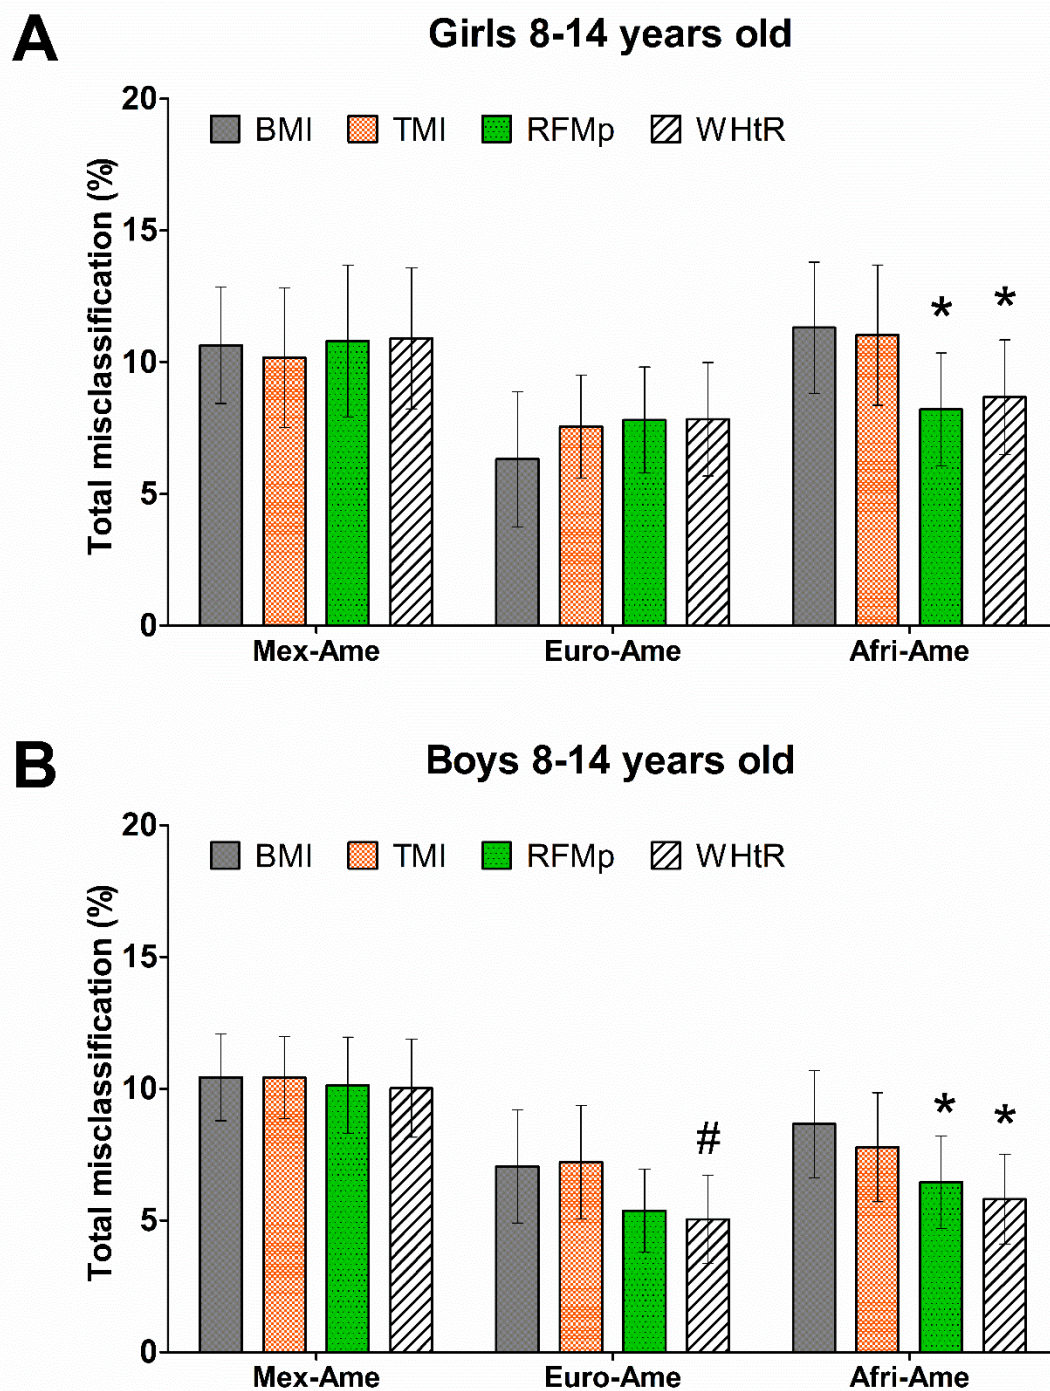

Error bars are 95% confidence intervals. Diagnostic cutoff values are 85<sup>th</sup> and 95<sup>th</sup> percentiles. \*P<0.01; #P<0.05; compared with BMI.

**Supplementary Figure 11.** Comparison of total misclassification error rates in the diagnosis of overweight or obesity between indices among adolescents 15 to 19 years of age.

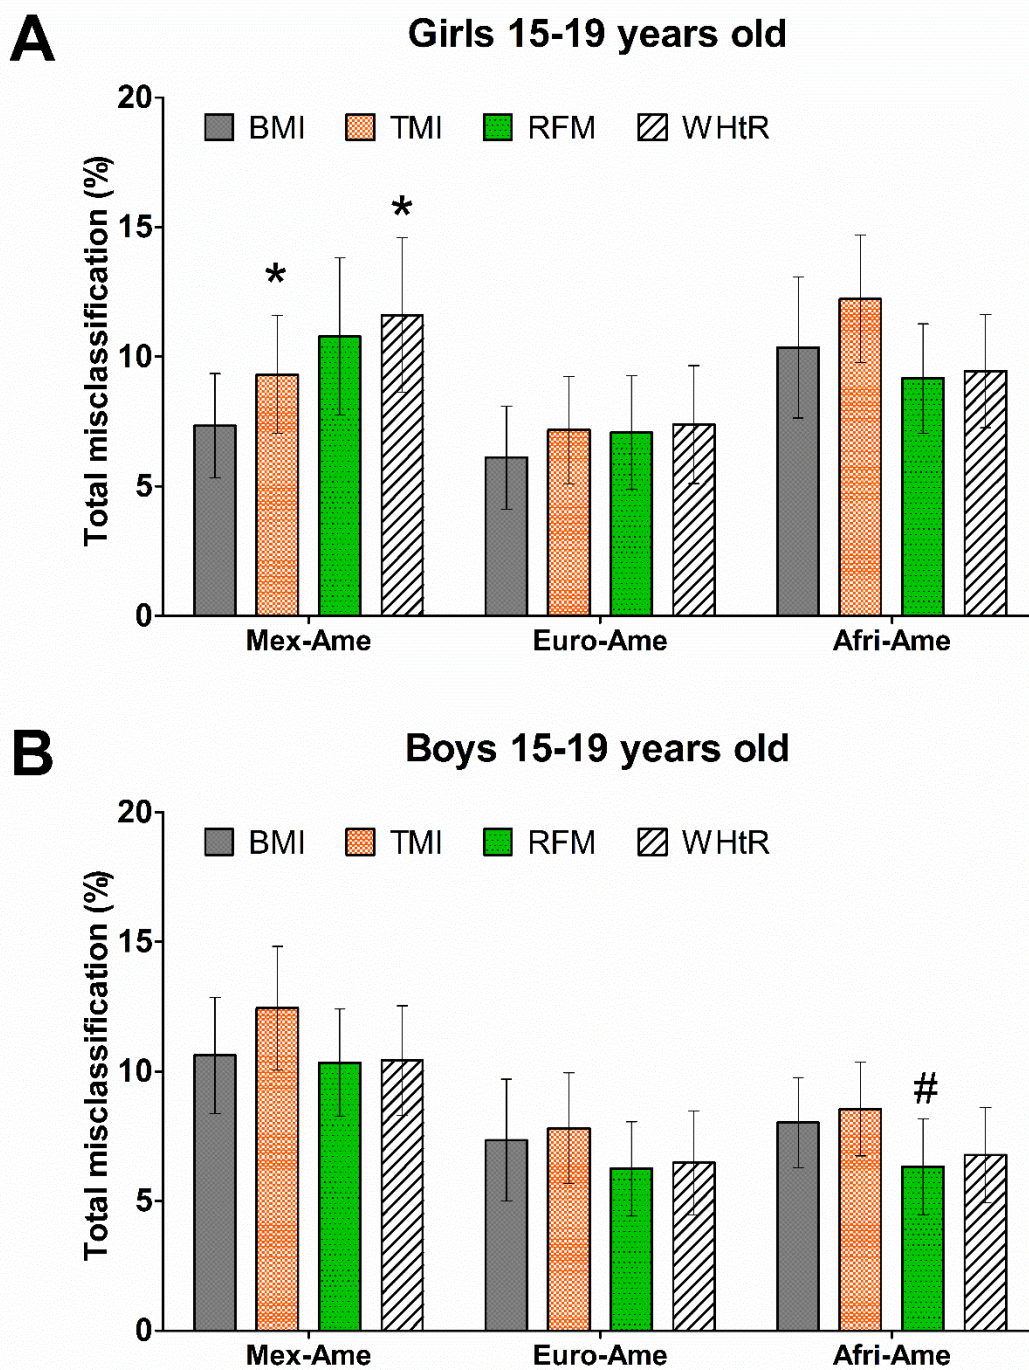

Error bars are 95% confidence intervals. Diagnostic cutoff values are 85<sup>th</sup> and 95<sup>th</sup> percentiles. \*P<0.01; #P<0.05; compared with BMI.

**Supplementary Table 1.** Derived equations for the prediction of DXA-estimated whole-body fat percentage among participants (8 to 19 years of age) in NHANES 1999-2006.

|                                            |                                                                                                                                            |
|--------------------------------------------|--------------------------------------------------------------------------------------------------------------------------------------------|
| <b>Equations for 8 to 14 years</b>         |                                                                                                                                            |
| <b>BMI</b>                                 |                                                                                                                                            |
| <i>Equation for girls</i>                  | $-2.829 - (0.023 \times (\text{weight}/\text{height}^2)^2) + (2.184 \times (\text{weight}/\text{height}^2))$                               |
| <i>Equation for boys</i>                   | $-7.761 - (0.020 \times (\text{weight}/\text{height}^2)^2) + (2.156 \times (\text{weight}/\text{height}^2))$                               |
| <i>Equation for girls and boys</i>         | $-7.338 - (0.021 \times (\text{weight}/\text{height}^2)^2) + (2.161 \times (\text{weight}/\text{height}^2)) + (4.16 \times \text{sex})$    |
| <b>TMI</b>                                 |                                                                                                                                            |
| <i>Equation for girls</i>                  | $-12.376 - (0.075 \times (\text{weight}/\text{height}^3)^2) + (4.305 \times (\text{weight}/\text{height}^3))$                              |
| <i>Equation for boys</i>                   | $-20.062 - (0.071 \times (\text{weight}/\text{height}^3)^2) + (4.516 \times (\text{weight}/\text{height}^3))$                              |
| <i>Equation for girls and boys</i>         | $-18.743 - (0.074 \times (\text{weight}/\text{height}^3)^2) + (4.47 \times (\text{weight}/\text{height}^3)) + (3.919 \times \text{sex})$   |
| <b>RFMp</b>                                |                                                                                                                                            |
| <i>Equation for girls</i>                  | $76.847 - (21.31 \times (\text{height}/\text{waist circumference}))$                                                                       |
| <i>Equation for boys</i>                   | $77.137 - (23.29 \times (\text{height}/\text{waist circumference}))$                                                                       |
| <i>Equation for girls and boys</i>         | $75.446 - (22.5 \times (\text{height}/\text{waist circumference})) + (3.9 \times \text{sex})$                                              |
| <b>WHtR</b>                                |                                                                                                                                            |
| <i>Equation for girls</i>                  | $-8.291 + (83.154 \times (\text{waist circumference}/\text{height}))$                                                                      |
| <i>Equation for boys</i>                   | $-16.456 + (91.588 \times (\text{waist circumference}/\text{height}))$                                                                     |
| <i>Equation for girls and boys</i>         | $-14.844 + (88.209 \times (\text{waist circumference}/\text{height})) + (4.093 \times \text{sex})$                                         |
| <b>Equations for 15 to 19 years of age</b> |                                                                                                                                            |
| <b>BMI</b>                                 |                                                                                                                                            |
| <i>Equation for girls</i>                  | $-7.082 - (0.023 \times (\text{weight}/\text{height}^2)^2) + (2.305 \times (\text{weight}/\text{height}^2))$                               |
| <i>Equation for boys</i>                   | $-13.43 - (0.013 \times (\text{weight}/\text{height}^2)^2) + (1.815 \times (\text{weight}/\text{height}^2))$                               |
| <i>Equation for girls and boys</i>         | $-16.284 - (0.018 \times (\text{weight}/\text{height}^2)^2) + (2.073 \times (\text{weight}/\text{height}^2)) + (11.734 \times \text{sex})$ |
| <b>TMI</b>                                 |                                                                                                                                            |
| <i>Equation for girls</i>                  | $-5.636 - (0.058 \times (\text{weight}/\text{height}^3)^2) + (3.601 \times (\text{weight}/\text{height}^3))$                               |
| <i>Equation for boys</i>                   | $-12.747 - (0.037 \times (\text{weight}/\text{height}^3)^2) + (3.107 \times (\text{weight}/\text{height}^3))$                              |
| <i>Equation for girls and boys</i>         | $-15.539 - (0.054 \times (\text{weight}/\text{height}^3)^2) + (3.561 \times (\text{weight}/\text{height}^3)) + (9.62 \times \text{sex})$   |
| <b>RFM*</b>                                |                                                                                                                                            |
| <i>Equation for adult women</i>            | $73.071 - (18.554 \times \text{height}/\text{waist circumference})$                                                                        |
| <i>Equation for adult men</i>              | $64.980 - (20.469 \times \text{height}/\text{waist circumference})$                                                                        |
| <i>Equation for adult women and men</i>    | $62.979 - (19.361 \times \text{height}/\text{waist circumference}) + (11.536 \times \text{sex})$                                           |
| <b>WHtR</b>                                |                                                                                                                                            |

|                                    |                                                                                            |
|------------------------------------|--------------------------------------------------------------------------------------------|
| <i>Equation for girls</i>          | $-0.342 + (68.629 \times (\text{waist circumference/height}))$                             |
| <i>Equation for boys</i>           | $-16.043 + (80.667 \times (\text{waist circumference/height}))$                            |
| <i>Equation for girls and boys</i> | $-13.37 + (75.112 \times (\text{waist circumference/height})) + (9.747 \times \text{sex})$ |

\* Equations developed for adult individuals ( $\geq 20$  years of age) <sup>1</sup>.

TMI, tri-ponderal mass index; RFM, Relative Fat Mass; RFMp, Relative Fat Mass pediatric; BMI, body mass index (body weight in kilograms divided by squared height in meters). For TMI equations, body weight in kilograms, height in meters. WHtR, waist-to-height ratio.

For RFM equations, height and waist circumference are in same units.

**Supplementary Table 2.** Comparison of anthropometric indices for prediction of body fat percentage by sex and age among children and adolescents 8 to 14 years of age .\*

|                                                                     | Age (years) |      |      |      |      |      |      |
|---------------------------------------------------------------------|-------------|------|------|------|------|------|------|
|                                                                     | 8           | 9    | 10   | 11   | 12   | 13   | 14   |
| <b>Girls, n</b>                                                     | 278         | 276  | 259  | 279  | 411  | 444  | 436  |
| <b>R<sup>2</sup> (95% CI) †</b>                                     |             |      |      |      |      |      |      |
| <i>BMI equation for girls 8 to 14 years of age</i>                  | 0.69        | 0.69 | 0.71 | 0.71 | 0.74 | 0.74 | 0.73 |
| <i>TMI equation for girls 8 to 14 years of age</i>                  | 0.67        | 0.69 | 0.75 | 0.72 | 0.71 | 0.72 | 0.72 |
| <i>RFM pediatric (RFMp) equation for girls 8 to 14 years of age</i> | 0.71        | 0.69 | 0.78 | 0.77 | 0.76 | 0.76 | 0.73 |
| <i>WHtR equation for girls 8 to 14 years of age</i>                 | 0.73        | 0.68 | 0.77 | 0.76 | 0.76 | 0.74 | 0.73 |
| <b>RMSE (95% CI) ‡</b>                                              |             |      |      |      |      |      |      |
| <i>BMI equation for girls 8 to 14 years of age</i>                  | 3.77        | 3.62 | 4.02 | 3.73 | 3.57 | 3.57 | 3.63 |
| <i>TMI equation for girls 8 to 14 years of age</i>                  | 3.91        | 3.66 | 3.78 | 3.66 | 3.78 | 3.65 | 3.72 |
| <i>RFM pediatric (RFMp) equation for girls 8 to 14 years of age</i> | 3.66        | 3.61 | 3.56 | 3.35 | 3.42 | 3.37 | 3.63 |
| <i>WHtR equation for girls 8 to 14 years of age</i>                 | 3.52        | 3.67 | 3.61 | 3.41 | 3.45 | 3.57 | 3.66 |
|                                                                     |             |      |      |      |      |      |      |
| <b>Boys, n</b>                                                      | 358         | 350  | 362  | 330  | 589  | 567  | 529  |
| <b>R<sup>2</sup> (95% CI) †</b>                                     |             |      |      |      |      |      |      |
| <i>BMI equation for boys 8 to 14 years of age</i>                   | 0.73        | 0.80 | 0.77 | 0.71 | 0.68 | 0.56 | 0.61 |
| <i>TMI equation for boys 8 to 14 years of age</i>                   | 0.68        | 0.80 | 0.76 | 0.70 | 0.72 | 0.62 | 0.67 |
| <i>RFM pediatric (RFMp) equation for boys 8 to 14 years of age</i>  | 0.74        | 0.78 | 0.79 | 0.78 | 0.81 | 0.75 | 0.77 |
| <i>WHtR equation for boys 8 to 14 years of age</i>                  | 0.75        | 0.80 | 0.79 | 0.78 | 0.80 | 0.74 | 0.77 |
| <b>RMSE (95% CI) ‡</b>                                              |             |      |      |      |      |      |      |
| <i>BMI equation for boys 8 to 14 years of age</i>                   | 3.80        | 3.30 | 3.68 | 4.42 | 4.78 | 5.37 | 4.63 |
| <i>TMI equation for boys 8 to 14 years of age</i>                   | 4.13        | 3.44 | 3.74 | 4.54 | 4.44 | 5.00 | 4.30 |
| <i>RFM pediatric (RFMp) equation for boys 8 to 14 years of age</i>  | 3.74        | 3.42 | 3.50 | 3.91 | 3.66 | 4.01 | 3.61 |
| <i>WHtR equation for boys 8 to 14 years of age</i>                  | 3.65        | 3.25 | 3.49 | 3.88 | 3.81 | 4.14 | 3.55 |

\* Values represent pooled weighted estimates from DXA imputed data.

† R<sup>2</sup>, coefficient of determination.

‡ RMSE, root mean squared error.



**Supplementary Table 3.** Comparison of anthropometric indices for prediction of body fat percentage by sex and age among adolescents 15 to 19 years of age.\*

|                                                      | Age (years) |      |      |      |      |
|------------------------------------------------------|-------------|------|------|------|------|
|                                                      | 15          | 16   | 17   | 18   | 19   |
| <b>Girls, n</b>                                      | 391         | 371  | 389  | 514  | 445  |
| <b>R<sup>2</sup> (95% CI) †</b>                      |             |      |      |      |      |
| <i>BMI equation for girls 15 to 19 years of age</i>  | 0.73        | 0.68 | 0.70 | 0.76 | 0.73 |
| <i>TMI equation for girls 15 to 19 years of age</i>  | 0.72        | 0.67 | 0.71 | 0.75 | 0.71 |
| <i>RFM equation for adult women</i>                  | 0.75        | 0.66 | 0.73 | 0.75 | 0.69 |
| <i>WHtR equation for girls 15 to 19 years of age</i> | 0.74        | 0.67 | 0.70 | 0.72 | 0.67 |
| <b>RMSE (95% CI) ‡</b>                               |             |      |      |      |      |
| <i>BMI equation for girls 15 to 19 years of age</i>  | 3.52        | 3.60 | 3.50 | 3.42 | 3.77 |
| <i>TMI equation for girls 15 to 19 years of age</i>  | 3.58        | 3.63 | 3.42 | 3.48 | 3.93 |
| <i>RFM equation for adult women</i>                  | 3.36        | 3.66 | 3.31 | 3.53 | 4.02 |
| <i>WHtR equation for girls 15 to 19 years of age</i> | 3.47        | 3.63 | 3.47 | 3.68 | 4.20 |
|                                                      |             |      |      |      |      |
| <b>Boys, n</b>                                       | 550         | 609  | 588  | 544  | 521  |
| <b>R<sup>2</sup> (95% CI) †</b>                      |             |      |      |      |      |
| <i>BMI equation for boys 15 to 19 years of age</i>   | 0.69        | 0.73 | 0.66 | 0.72 | 0.74 |
| <i>TMI equation for boys 15 to 19 years of age</i>   | 0.69        | 0.72 | 0.61 | 0.71 | 0.73 |
| <i>RFM equation for adult men</i>                    | 0.79        | 0.80 | 0.75 | 0.82 | 0.81 |
| <i>WHtR equation for boys 15 to 19 years of age</i>  | 0.80        | 0.81 | 0.76 | 0.82 | 0.83 |
| <b>RMSE (95% CI) ‡</b>                               |             |      |      |      |      |
| <i>BMI equation for boys 15 to 19 years of age</i>   | 4.01        | 4.00 | 3.95 | 3.71 | 3.77 |
| <i>TMI equation for boys 15 to 19 years of age</i>   | 3.99        | 4.08 | 4.23 | 3.78 | 3.85 |
| <i>RFM equation for adult men</i>                    | 3.27        | 3.48 | 3.38 | 3.01 | 3.18 |
| <i>WHtR equation for boys 15 to 19 years of age</i>  | 3.20        | 3.41 | 3.33 | 2.98 | 2.99 |

\* Values represent pooled weighted estimates from DXA imputed data.

† R<sup>2</sup>, coefficient of determination.

‡ RMSE, root mean squared error.

**Supplementary Table 4.** Performance of RFMp by ethnicity to estimate body fat percentage in children and adolescents 8 to 14 years of age.\*

|                               | All                 | Mexican-American    | European-American   | African-American    |
|-------------------------------|---------------------|---------------------|---------------------|---------------------|
| <b>Girls</b>                  |                     |                     |                     |                     |
| <b>Bias (95% CI)†</b>         |                     |                     |                     |                     |
| <i>BMI</i>                    | -0.1 (-0.4 to 0.2)  | -1.2 (-1.7 to -0.7) | -0.4 (-0.7 to -0.1) | 2.4 (2.0 to 2.7)    |
| <i>TMI</i>                    | 0.0 (-0.3 to 0.3)   | -0.2 (-0.7 to 0.2)  | -0.3 (-0.6 to 0.0)  | 2.3 (2.0 to 2.7)    |
| <i>RFMp</i>                   | 0.7 (0.4 to 1.0)    | 0.7 (0.4 to 0.9)    | 0.8 (0.4 to 1.1)    | 1.2 (0.7 to 1.6)    |
| <b>Accuracy, % (95% CI)‡</b>  |                     |                     |                     |                     |
| <i>BMI</i>                    | 85.6 (83.7 to 87.6) | 87.9 (85.4 to 90.4) | 87.8 (84.9 to 90.6) | 77.1 (74.4 to 79.8) |
| <i>TMI</i>                    | 88.7 (87.3 to 90.0) | 91.3 (89.1 to 93.5) | 91.1 (88.8 to 93.4) | 77.5 (74.4 to 80.7) |
| <i>RFMp</i>                   | 88.2 (86.5 to 89.9) | 91.3 (88.8 to 93.8) | 88.9 (86.1 to 91.7) | 83.8 (81.3 to 86.3) |
| <b>Precision, % (95% CI)§</b> |                     |                     |                     |                     |
| <i>BMI</i>                    | 5.71 (5.31 to 6.12) | 5.79 (5.28 to 6.31) | 5.34 (4.76 to 5.92) | 5.60 (5.06 to 6.14) |
| <i>TMI</i>                    | 5.21 (4.87 to 5.55) | 5.08 (4.66 to 5.49) | 4.79 (4.31 to 5.26) | 5.46 (4.98 to 5.94) |
| <i>RFMp</i>                   | 5.00 (4.73 to 5.28) | 4.52 (4.11 to 4.92) | 4.81 (4.41 to 5.21) | 5.21 (4.78 to 5.65) |
| <b>Boys</b>                   |                     |                     |                     |                     |
| <b>Bias (95% CI)</b>          |                     |                     |                     |                     |
| <i>BMI</i>                    | -0.3 (-0.7 to 0.1)  | -2.1 (-2.5 to -1.6) | -0.7 (-1.2 to -0.1) | 2.3 (1.9 to 2.7)    |
| <i>TMI</i>                    | 0.0 (-0.3 to 0.3)   | -0.5 (-0.8 to -0.2) | -0.4 (-0.7 to -0.1) | 2.7 (2.2 to 3.2)    |
| <i>RFMp</i>                   | -0.4 (-0.7 to -0.1) | -0.4 (-0.8 to -0.1) | -0.4 (-0.9 to 0.0)  | 0.1 (-0.3 to 0.5)   |
| <b>Accuracy, % (95% CI)</b>   |                     |                     |                     |                     |
| <i>BMI</i>                    | 71.0 (68.8 to 73.3) | 73.3 (70.4 to 76.1) | 73.4 (70.3 to 76.4) | 60.4 (56.9 to 63.9) |
| <i>TMI</i>                    | 77.3 (75.1 to 79.4) | 80.7 (77.6 to 83.7) | 80.1 (77.0 to 83.2) | 61.9 (58.6 to 65.3) |
| <i>RFMp</i>                   | 83.4 (81.5 to 85.4) | 86.2 (83.9 to 88.6) | 84.3 (81.5 to 87.2) | 76.5 (73.4 to 79.7) |
| <b>Precision, % (95% CI)</b>  |                     |                     |                     |                     |
| <i>BMI</i>                    | 7.16 (6.72 to 7.59) | 7.49 (6.83 to 8.16) | 6.67 (5.92 to 7.42) | 7.20 (6.59 to 7.81) |
| <i>TMI</i>                    | 5.98 (5.60 to 6.35) | 5.76 (5.21 to 6.31) | 5.75 (5.21 to 6.28) | 5.75 (5.25 to 6.26) |
| <i>RFMp</i>                   | 5.01 (4.67 to 5.35) | 5.00 (4.64 to 5.37) | 4.90 (4.44 to 5.36) | 5.47 (5.04 to 5.90) |

\* Values represent weighted estimates with 95% confidence intervals (95% CI) from DXA imputed data.

† Bias was calculated as the median difference between estimated and measured body fat percentage.

‡ Accuracy was calculated as the percentage of cases with <20% difference between estimated and measured body fat percentage.

§ Precision was calculated as the interquartile range of the difference between estimated and measured body fat percentage.

**Supplementary Table 5.** Performance of RFM by ethnicity to estimate body fat percentage in adolescents 15 to 19 years of age.\*

|                               | All                 | Mexican-American    | European-American   | African-American    |
|-------------------------------|---------------------|---------------------|---------------------|---------------------|
| <b>Girls</b>                  |                     |                     |                     |                     |
| <b>Bias (95% CI)†</b>         |                     |                     |                     |                     |
| <i>BMI</i>                    | 0.0 (-0.3 to 0.3)   | -1.2 (-1.6 to -0.8) | -0.1 (-0.5 to 0.3)  | 2.2 (1.8 to 2.5)    |
| <i>TMI</i>                    | 0.0 (-0.2 to 0.3)   | -0.5 (-0.9 to -0.1) | -0.4 (-0.8 to 0.0)  | 2.0 (1.7 to 2.4)    |
| <i>RFM</i>                    | 1.1 (0.9 to 1.4)    | 1.1 (0.8 to 1.5)    | 1.1 (0.7 to 1.4)    | 1.6 (1.2 to 2.1)    |
| <b>Accuracy, % (95% CI)‡</b>  |                     |                     |                     |                     |
| <i>BMI</i>                    | 92.6 (91.1 to 94.1) | 94.6 (93.1 to 96.1) | 93.7 (91.3 to 96.0) | 85.4 (82.5 to 88.3) |
| <i>TMI</i>                    | 91.5 (90.0 to 93.0) | 93.8 (92.1 to 95.6) | 92.6 (90.3 to 94.8) | 84.1 (80.9 to 87.2) |
| <i>RFM</i>                    | 89.0 (86.7 to 91.2) | 92.9 (90.9 to 94.8) | 89.2 (86.1 to 92.3) | 86.7 (84.2 to 89.2) |
| <b>Precision, % (95% CI)§</b> |                     |                     |                     |                     |
| <i>BMI</i>                    | 4.78 (4.52 to 5.05) | 4.51 (4.16 to 4.87) | 4.58 (4.10 to 5.07) | 4.62 (4.20 to 5.04) |
| <i>TMI</i>                    | 4.76 (4.43 to 5.08) | 4.80 (4.49 to 5.10) | 4.68 (4.25 to 5.11) | 4.93 (4.50 to 5.37) |
| <i>RFM</i>                    | 4.64 (4.35 to 4.93) | 4.80 (4.44 to 5.15) | 4.57 (4.10 to 5.04) | 4.81 (4.43 to 5.18) |
| <b>Boys</b>                   |                     |                     |                     |                     |
| <b>Bias (95% CI)</b>          |                     |                     |                     |                     |
| <i>BMI</i>                    | 0.4 (0.2 to 0.7)    | -1.2 (-1.5 to -1.0) | 0.4 (0.1 to 0.7)    | 3.0 (2.7 to 3.3)    |
| <i>TMI</i>                    | 0.3 (0.0 to 0.6)    | -0.7 (-1.0 to -0.4) | 0.1 (-0.4 to 0.6)   | 2.8 (2.5 to 3.1)    |
| <i>RFM</i>                    | -1.1 (-1.4 to -0.8) | -1.5 (-1.8 to -1.3) | -1.1 (-1.5 to -0.7) | -0.6 (-0.9 to -0.4) |
| <b>Accuracy, % (95% CI)</b>   |                     |                     |                     |                     |
| <i>BMI</i>                    | 73.9 (71.3 to 76.5) | 79.2 (76.3 to 82.1) | 76.7 (73.4 to 79.9) | 53.0 (49.4 to 56.6) |
| <i>TMI</i>                    | 72.8 (70.0 to 75.6) | 80.5 (78.0 to 83.0) | 74.0 (70.3 to 77.6) | 54.8 (51.3 to 58.4) |
| <i>RFM</i>                    | 82.3 (80.3 to 84.2) | 86.1 (83.6 to 88.7) | 83.3 (80.5 to 86.1) | 79.5 (77.3 to 81.6) |
| <b>Precision, % (95% CI)</b>  |                     |                     |                     |                     |
| <i>BMI</i>                    | 5.09 (4.79 to 5.39) | 4.76 (4.29 to 5.22) | 4.95 (4.46 to 5.44) | 5.17 (4.85 to 5.48) |
| <i>TMI</i>                    | 5.25 (4.94 to 5.56) | 5.15 (4.69 to 5.61) | 5.21 (4.81 to 5.60) | 5.39 (4.99 to 5.80) |
| <i>RFM</i>                    | 4.51 (4.21 to 4.80) | 4.34 (4.02 to 4.65) | 4.53 (4.09 to 4.97) | 4.29 (3.92 to 4.67) |

\* Values represent weighted estimates with 95% confidence intervals (95% CI) from DXA imputed data.

† Bias was calculated as the median difference between estimated and measured body fat percentage.

‡ Accuracy was calculated as the percentage of cases with <20% difference between estimated and measured body fat percentage.

§ Precision was calculated as the interquartile range of the difference between estimated and measured body fat percentage.

**Supplementary Table 6.** Youden's index cutoffs, false negative rate, false positive rate, and Youden's index for anthropometric indices to diagnose overweight and obesity among children and adolescents.

| <b>Overweight*</b>                 |               |                |                |                       |
|------------------------------------|---------------|----------------|----------------|-----------------------|
|                                    | <b>Cutoff</b> | <b>FNR (%)</b> | <b>FPR (%)</b> | <b>Youden's index</b> |
| <b>Girls 8 to 14 years of age</b>  |               |                |                |                       |
| <i>BMI</i>                         | 21.5          | 9.5            | 29.1           | 0.61                  |
| <i>TMI</i>                         | 15.5          | 14.0           | 17.2           | 0.69                  |
| <i>RFMp</i>                        | 36.1          | 5.8            | 23.1           | 0.71                  |
| <b>Boys 8 to 14 years of age</b>   |               |                |                |                       |
| <i>BMI</i>                         | 22.3          | 11.0           | 17.7           | 0.71                  |
| <i>TMI</i>                         | 14.5          | 6.8            | 19.7           | 0.73                  |
| <i>RFMp</i>                        | 31.6          | 8.9            | 17.1           | 0.74                  |
| <b>Girls 15 to 19 years of age</b> |               |                |                |                       |
| <i>BMI</i>                         | 26.2          | 8.3            | 19.6           | 0.72                  |
| <i>TMI</i>                         | 16.0          | 7.7            | 21.6           | 0.71                  |
| <i>RFM</i>                         | 38.7          | 7.7            | 19.8           | 0.73                  |
| <b>Boys 15 to 19 years of age</b>  |               |                |                |                       |
| <i>BMI</i>                         | 26.1          | 10.9           | 21.9           | 0.67                  |
| <i>TMI</i>                         | 14.7          | 9.9            | 23.4           | 0.67                  |
| <i>RFM</i>                         | 25.2          | 6.7            | 19.0           | 0.74                  |
| <b>Obesity†</b>                    |               |                |                |                       |
|                                    | <b>Cutoff</b> | <b>FNR (%)</b> | <b>FPR (%)</b> | <b>Youden's index</b> |
| <b>Girls 8 to 14 years of age</b>  |               |                |                |                       |
| <i>BMI</i>                         | 25.3          | 4.9            | 12.7           | 0.82                  |
| <i>TMI</i>                         | 16.3          | 1.9            | 13.7           | 0.84                  |
| <i>RFMp</i>                        | 40.6          | 5.6            | 9.6            | 0.85                  |
| <b>Boys 8 to 14 years of age</b>   |               |                |                |                       |
| <i>BMI</i>                         | 23.8          | 4.8            | 13.9           | 0.81                  |
| <i>TMI</i>                         | 16.0          | 3.3            | 11.5           | 0.85                  |
| <i>RFMp</i>                        | 34.5          | 0.4            | 10.8           | 0.89                  |
| <b>Girls 15 to 19 years of age</b> |               |                |                |                       |
| <i>BMI</i>                         | 31.2          | 4.0            | 8.0            | 0.88                  |
| <i>TMI</i>                         | 19.4          | 5.5            | 7.2            | 0.87                  |
| <i>RFM</i>                         | 41.9          | 5.1            | 12.5           | 0.82                  |
| <b>Boys 15 to 19 years of age</b>  |               |                |                |                       |
| <i>BMI</i>                         | 29.5          | 4.1            | 11.9           | 0.84                  |
| <i>TMI</i>                         | 16.6          | 4.3            | 12.2           | 0.84                  |
| <i>RFM</i>                         | 29.9          | 7.9            | 7.6            | 0.85                  |

FNR, false negative rate (1-sensitivity); FPR, false positive rate (1-specificity).

\* Diagnosis based on a DXA-measured whole-body fat percentage  $\geq 85^{\text{th}}$  and  $< 95^{\text{th}}$  percentile.

† Diagnosis based on a DXA-measured whole-body fat percentage of  $\geq 95^{\text{th}}$  percentile.

**Supplementary Table 7.** Correlation matrix (Pearson's r) between anthropometrics and biomarkers for cardiometabolic disease among children and adolescents 8 to 14 years of age.

|                               | log-Insulin* | log-Glucose | LDLc* | log-HDLc | log-TAG* | log-Total cholesterol | log-(TAG/HDLc) |
|-------------------------------|--------------|-------------|-------|----------|----------|-----------------------|----------------|
| <b>Girls (n=507)</b>          |              |             |       |          |          |                       |                |
| log-Body mass index (BMI)     | 0.60†        | 0.01        | 0.13§ | -0.20§   | 0.20‡    | 0.09                  | 0.23‡          |
| log-Waist circumference       | 0.59†        | 0.03        | 0.13§ | -0.23‡   | 0.26†    | 0.09                  | 0.30†          |
| DXA-whole-body fat percentage | 0.57†        | 0.07        | 0.14§ | -0.19‡   | 0.26†    | 0.12§                 | 0.28†          |
| DXA-trunk fat percentage      | 0.60†        | 0.05        | 0.18‡ | -0.21‡   | 0.28†    | 0.14§                 | 0.30†          |
| RFMp                          | 0.59†        | 0.01        | 0.15§ | -0.26†   | 0.27†    | 0.10                  | 0.31†          |
| Waist-to-height ratio         | 0.59†        | 0.04        | 0.15§ | -0.25†   | 0.26†    | 0.09                  | 0.30†          |
| <b>Boys (n=714)</b>           |              |             |       |          |          |                       |                |
| log-Body mass index (BMI)     | 0.68†        | 0.09        | 0.15§ | -0.49†   | 0.35†    | 0.06                  | 0.45†          |
| log-Waist circumference       | 0.69†        | 0.09        | 0.13§ | -0.49†   | 0.40†    | 0.05                  | 0.49†          |
| DXA-whole-body fat percentage | 0.54†        | 0.05        | 0.27† | -0.37†   | 0.39†    | 0.21†                 | 0.44†          |
| DXA-trunk fat percentage      | 0.60†        | 0.04        | 0.27† | -0.41†   | 0.43†    | 0.21†                 | 0.48†          |
| RFMp                          | 0.63†        | 0.09        | 0.21† | -0.44†   | 0.41†    | 0.14§                 | 0.48†          |
| Waist-to-height ratio         | 0.65†        | 0.09        | 0.20‡ | -0.45†   | 0.41†    | 0.14§                 | 0.48†          |

HDLc, high-density lipoprotein cholesterol; LDLc, low-density lipoprotein cholesterol; TAG, triacylglycerol; TAG/HDLc, ratio of TAG to HDLc.

\* Measured in the fasting state. †P<0.001; ‡P<0.01; §P<0.05.

**Supplementary Table 8.** Correlation matrix (Pearson's r) between anthropometrics and biomarkers for cardiometabolic disease among adolescents 15 to 19 years of age.

|                               | log-Insulin* | log-Glucose | LDLc* | log-HDLc | log-TAG* | log-Total cholesterol | log-(TAG/HDLc) |
|-------------------------------|--------------|-------------|-------|----------|----------|-----------------------|----------------|
| <b>Girls (n=882)</b>          |              |             |       |          |          |                       |                |
| log-Body mass index (BMI)     | 0.52†        | 0.16†       | 0.17† | -0.32†   | 0.15†    | 0.06                  | 0.26†          |
| log-Waist circumference       | 0.48†        | 0.18†       | 0.18† | -0.33†   | 0.19†    | 0.07                  | 0.29†          |
| DXA-whole-body fat percentage | 0.46†        | 0.15†       | 0.22† | -0.30†   | 0.16†    | 0.11‡                 | 0.26†          |
| DXA-trunk fat percentage      | 0.50†        | 0.16†       | 0.25† | -0.34†   | 0.19†    | 0.13§                 | 0.30†          |
| RFM                           | 0.48†        | 0.17†       | 0.19† | -0.34†   | 0.19†    | 0.07                  | 0.30†          |
| Waist-to-height ratio         | 0.50†        | 0.18†       | 0.18† | -0.32†   | 0.18†    | 0.08                  | 0.28†          |
| <b>Boys (n=1,207)</b>         |              |             |       |          |          |                       |                |
| log-Body mass index (BMI)     | 0.56†        | 0.14†       | 0.29† | -0.33†   | 0.38†    | 0.29†                 | 0.42†          |
| log-Waist circumference       | 0.59†        | 0.15†       | 0.28† | -0.37†   | 0.43†    | 0.28†                 | 0.47†          |
| DXA-whole-body fat percentage | 0.59†        | 0.17†       | 0.26† | -0.34†   | 0.38†    | 0.25†                 | 0.42†          |
| DXA-trunk fat percentage      | 0.61†        | 0.16†       | 0.28† | -0.36†   | 0.43†    | 0.28†                 | 0.47†          |
| RFM                           | 0.59†        | 0.16†       | 0.29† | -0.34†   | 0.42†    | 0.30†                 | 0.45†          |
| Waist-to-height ratio         | 0.60†        | 0.15†       | 0.29† | -0.35†   | 0.42†    | 0.29†                 | 0.46†          |

HDLc, high-density lipoprotein cholesterol; LDLc, low-density lipoprotein cholesterol; TAG, triacylglycerol; TAG/HDLc, ratio of TAG to HDLc.

\* Measured in the fasting state. †P<0.001; ‡P<0.05; §P<0.01.

**REFERENCE**

1. Woolcott, O. O. & Bergman, R. N. Relative fat mass (RFM) as a new estimator of whole-body fat percentage — A cross-sectional study in American adult individuals. *Sci Rep* **8**, 10980 (2018).
